# Supplementary material for: Acute stress reduces population-level metabolic and proteomic variation
Source: Springer Nature journal article supplement (doi:10.1186/s12859-023-05185-4), 2023-03-07
Supplement: 12859_2023_5185_MOESM1_ESM.pdf [file 12859_2023_5185_MOESM1_ESM.pdf]

Figure S1

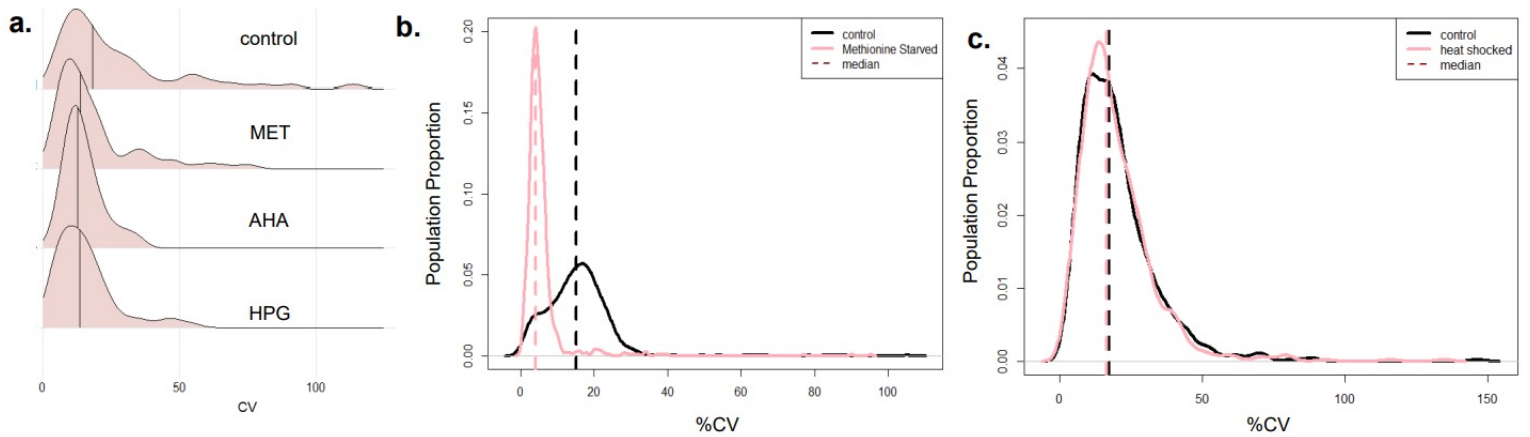

**Supplementary Figure 1.** a. Distribution plots of CV of NMR metabolite feature profiles for the non-canonical amino acid treated cultures of *E. coli*. b. CV profiles of metabolites in methionine dependent cancer cells with methionine (MET) or homocysteine (Hcy). c. CV profiles of metabolites from replicates of mayflies that were exposed to heat stress (pink) and the analogous control group (black).

Figure S2

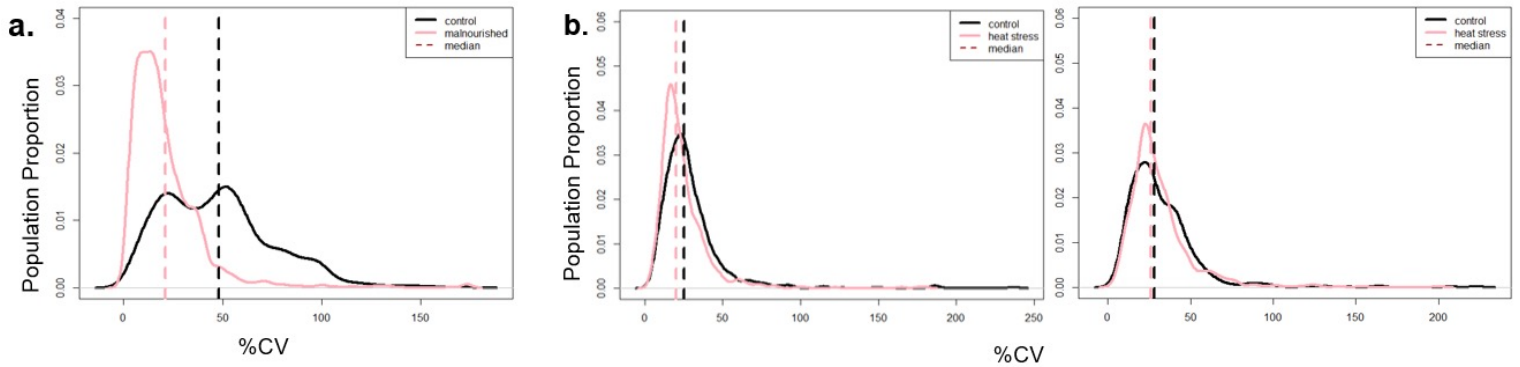

**Supplementary Figure 2.** Undernourished mouse model studies and Temperature Acclimated Abalone. **a.** Distribution plots of CV metabolite features from control mice (black) and malnourished mice (pink). **b.** Distribution plots of CV metabolite features from replicates of cold (left panel) or high temperature (right panel) acclimated *Haliotis discus hannai* that were exposed to heat stress (pink) and the analogous control group (black).

Figure S3

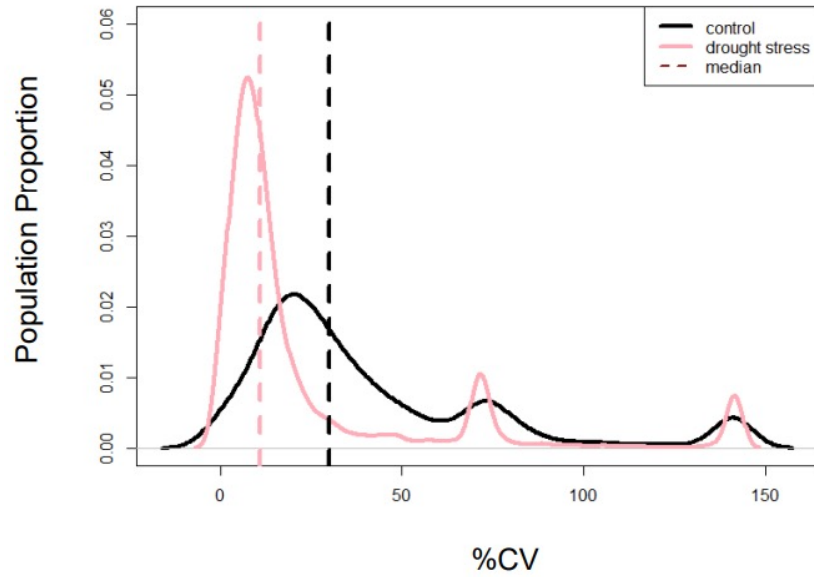

**Supplemental Figure 3.** Distribution profile plots of proteomic data collected on wheatleaf (black) and wheatleaf that has been exposed to drought stress using PEG (pink).

Figure S4

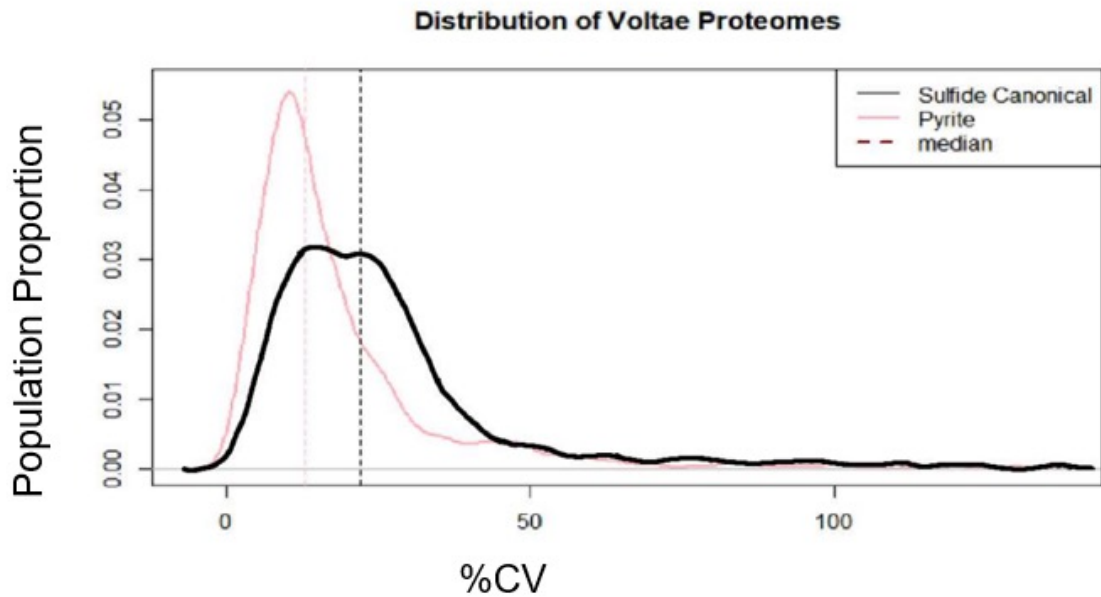

**Supplemental Figure 4.** Distribution profile plots of proteomic data collected on *M. voltae* grown under canonical sulfide ( $\text{Fe(II)/HS}^-$ ) (black) and *M. voltae* that has been exposed to mineral stress through growth on pyrite ( $\text{FeS}_2$ ) (pink). Mean from 25.8% to 18.5%  
Median (shown) from 21.5% to 13.2%

Figure S5

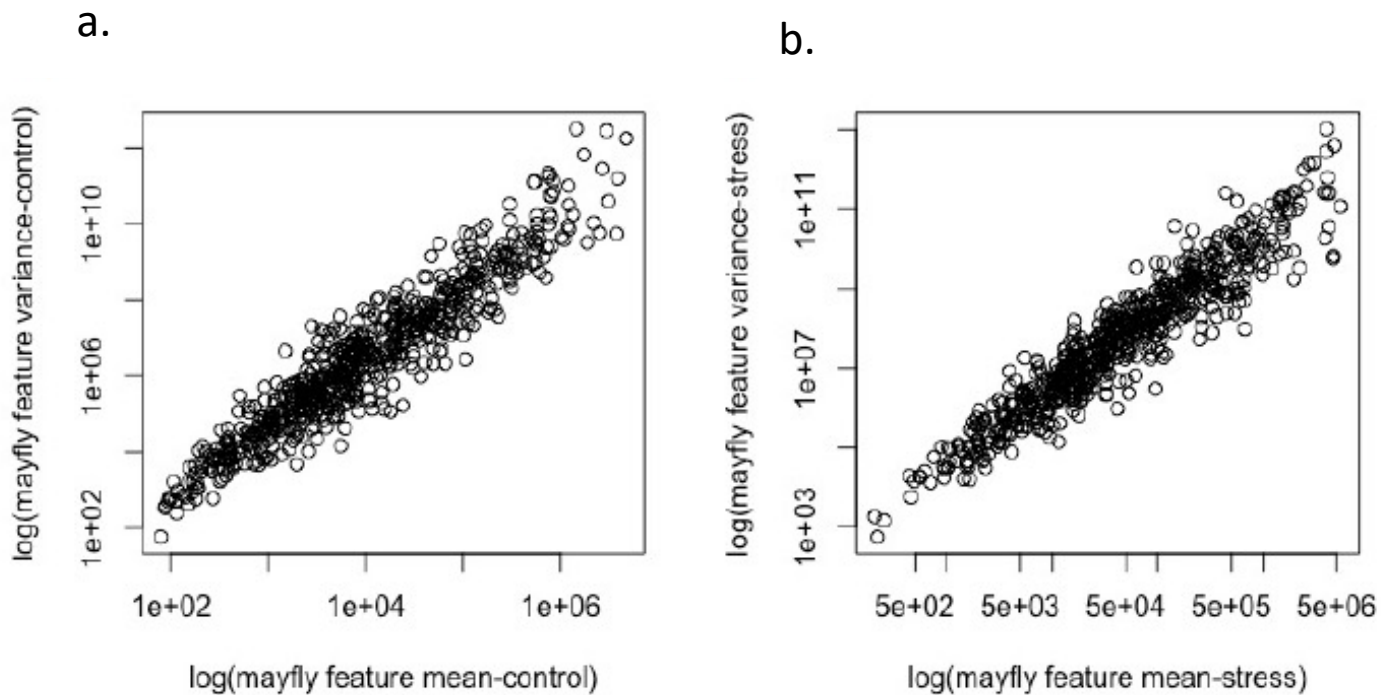

Supplemental Figure 5. Relationship between feature mean and variance for control replicates from the mayfly data (a) and the heat stressed mayfly replicates (b).
